# Supplementary material for: Multidimensional Child Deprivation in Ireland: A New Child Rights-Informed Approach
Source: Research Square preprint supplement (doi:10.21203/rs.3.rs-7790955/v1), 2025-10-26
Supplement: Supplementary file 1 [file ae8f66b2a00c809fcd21d02a.pdf]

## **Supplementary Information**

**Article title:**

Multidimensional Child Deprivation in Ireland: A New Child Rights-Informed Approach

**Journal name:**

Child Indicators Research

## Appendix A

| <b>Distribution of Independent Variables Used in Logistic Regression</b> |             |             |
|--------------------------------------------------------------------------|-------------|-------------|
| Variable                                                                 | Age 9       | Age 13      |
|                                                                          | Percent (%) | Percent (%) |
| Equivalised Net Household Income Quintile                                |             |             |
| 1 <sup>st</sup>                                                          | 17.04       | 17.41       |
| 2 <sup>nd</sup>                                                          | 19.55       | 18.23       |
| 3 <sup>rd</sup>                                                          | 18.52       | 18.05       |
| 4 <sup>th</sup>                                                          | 18.27       | 17.86       |
| 5 <sup>th</sup>                                                          | 17.11       | 18.15       |
| Missing                                                                  | 9.52        | 10.3        |
| Child's Gender                                                           |             |             |
| Male                                                                     | 50.71       | 50.71       |
| Female                                                                   | 49.29       | 49.29       |
| Mother's age group                                                       |             |             |
| 20-39 Years                                                              | 42.66       | 19.8        |
| 40-49 Years                                                              | 53.75       | 62.1        |
| 50 Years or Older                                                        | 3.58        | 18.1        |
| Family status                                                            |             |             |
| Couple family                                                            | 83.97       | 83.43       |
| Lone parent family                                                       | 16.03       | 16.57       |
| Mother's highest educational level                                       |             |             |
| School                                                                   | 27.22       | 25.92       |
| Higher Education                                                         | 55.11       | 55.83       |
| Postgraduate                                                             | 17.67       | 18.25       |
| Mother's employment status                                               |             |             |
| Employed                                                                 | 61.96       | 72.4        |
| Not in Work                                                              | 36.53       | 26.79       |
| Studying/Training                                                        | 1.52        | 0.81        |

*Note:* N=5,442. Results are weighted using the longitudinal survey weight provided with GUI data. Data was collected in 2017/18 for children at age 9 and 2021/22 for children at age 13. *Data:* Growing Up in Ireland Survey '08 Cohort, 2017/18 (Wave 5) and 2021/22 (Wave 6).

## Appendix B

| Coefficients from logistic regression of multidimensional deprivation status on income quintile. |          |          |          |          |
|--------------------------------------------------------------------------------------------------|----------|----------|----------|----------|
|                                                                                                  | (1)      |          | (2)      |          |
|                                                                                                  | Age 9    | Age 13   | Age 9    | Age 13   |
| Income quintile<br>(ref: 5 <sup>th</sup> quintile)                                               |          |          |          |          |
| 1 <sup>st</sup>                                                                                  | 1.21***  | 1.02***  | 0.59**   | 0.54**   |
| 2 <sup>nd</sup>                                                                                  | 0.91***  | 0.97***  | 0.46**   | 0.56***  |
| 3 <sup>rd</sup>                                                                                  | 0.64***  | 0.80***  | 0.33*    | 0.49**   |
| 4 <sup>th</sup>                                                                                  | 0.47**   | 0.57***  | 0.29     | 0.41**   |
| Missing                                                                                          | 0.59**   | 0.52**   | 0.29     | 0.29     |
| Child's gender<br>(ref: Male)                                                                    |          |          |          |          |
| Female                                                                                           |          |          | -0.13    | 0.23*    |
| Mother's age group<br>(ref: 50 or older)                                                         |          |          |          |          |
| 20-39 years                                                                                      |          |          | 0.42     | 0.86***  |
| 40-49 years                                                                                      |          |          | -0.13    | 0.25*    |
| Family status<br>(ref: Couple family)                                                            |          |          |          |          |
| Lone parent family                                                                               |          |          | 0.45**   | 0.30*    |
| Mother's highest educational<br>level<br>(ref: Postgraduate)                                     |          |          |          |          |
| School                                                                                           |          |          | 1.20***  | 1.16***  |
| Higher Education                                                                                 |          |          | 0.46***  | 0.69***  |
| Mother's employment status<br>(ref: Employed)                                                    |          |          |          |          |
| Studying/Training                                                                                |          |          | 0        | 0.48     |
| Not in work                                                                                      |          |          | -0.13    | -0.25*   |
| Constant                                                                                         | -1.74*** | -1.59*** | -2.14*** | -2.49*** |
| N                                                                                                | 5,442    | 5,442    | 5,442    | 5,442    |

Note: \* p<0.05, \*\* p<0.01, \*\*\* p<0.001. Note that these coefficients are not comparable in magnitude between models due to the rescaling effect associated with adding predictors to logistic probability models. The dependent variable in logistic regression (1) without controls and (2) with controls is a binary indicator variable for multidimensional deprivation status. In income quintile, "1<sup>st</sup>" denotes the lowest equivalised income quintile. Reference categories for independent variables are included in brackets. Results are weighted using the longitudinal survey weight provided with GUI data. Data was collected in 2017/18 for children at age 9 and 2021/22 for children at age 13.

Data: Growing Up in Ireland Survey '08 Cohort, 2017/18 (Wave 5) and 2021/22 (Wave 6).
